# Supplementary material for: Safety and efficacy of tofacitinib for treatment of ulcerative colitis: final analysis of OCTAVE Open, an open‐label, long‐term extension study with up to 7.0 years of treatment
Source: PubMed Central journal article supplement — Aliment Pharmacol Ther. 2021 Dec 1;55(4):464–78. doi: 10.1111/apt.16712 (PMC9300081; doi:10.1111/apt.16712), 2021-12-01
Supplement: APT-55-464-s001.pdf [file APT-55-464-s001.pdf]

## SUPPORTING INFORMATION

### CONTENTS

|                                                                                                   |    |
|---------------------------------------------------------------------------------------------------|----|
| <b>Supplementary Methods</b> .....                                                                | 1  |
| <b>1. Criteria for dose de-escalation from tofacitinib 10 mg to 5 mg twice daily (b.d.)</b> ..... | 1  |
| <b>2. Risk factor check for pulmonary embolism</b> .....                                          | 2  |
| <b>3. Concomitant and prohibited concomitant medications in OCTAVE Open</b> .....                 | 2  |
| 3.1 <i>Concomitant medications</i> .....                                                          | 2  |
| 3.2 <i>Prohibited concomitant medications</i> .....                                               | 4  |
| <b>4. Trial locations</b> .....                                                                   | 5  |
| <b>Supplementary Tables</b> .....                                                                 | 26 |
| TABLE S1 Additional reasons for discontinuation in OCTAVE Open .....                              | 26 |
| TABLE S2 Summary of deaths in OCTAVE Open.....                                                    | 27 |
| TABLE S3 Listing of adjudicated malignancy (excluding NMSC) events in OCTAVE Open ...             | 28 |
| TABLE S5 Listing of adjudicated MACE in OCTAVE Open .....                                         | 32 |
| TABLE S6 Proportion of patients evaluated for drug-induced liver injury.....                      | 34 |
| <b>Supplementary Figures</b> .....                                                                | 35 |

### Supplementary Methods

#### 1. Criteria for dose de-escalation from tofacitinib 10 mg to 5 mg twice daily (b.d.)

For patients receiving tofacitinib 10 mg b.d., tofacitinib dose could be adjusted to 5 mg b.d. if the patients met any of the following laboratory criteria (repeated and confirmed within 7 days): any single haemoglobin value that dropped >2 g/dL below baseline of OCTAVE Open; an absolute neutrophil count <1200 neutrophils/mm<sup>3</sup>; an absolute lymphocyte count <750 lymphocytes/mm<sup>3</sup>; a platelet count <100,000 platelets/mm<sup>3</sup>.

In addition, for patients receiving tofacitinib 10 mg b.d., the dose could be adjusted to 5 mg b.d. if the patient was in remission (based on total Mayo score) or in partial Mayo score (PMS) remission (defined as a PMS  $\leq 2$  with no individual subscore  $>1$ ) at Month 24 or at any visit beyond Month 24, after discussion with the sponsor.

## **2. Risk factor check for pulmonary embolism**

If a patient had any of the risk factors listed below and was receiving tofacitinib 10 mg b.d., the patient's tofacitinib dose was reduced to 5 mg b.d. If a patient had any newly developed risk factors for pulmonary embolism identified during the study, they were not permitted to receive tofacitinib 10 mg b.d.

A patient may be at high risk for pulmonary embolism if he/she:

- has heart failure;
- has inherited coagulation disorders;
- has had venous thromboembolism, either deep venous thrombosis or pulmonary embolism;
- is taking combined hormonal contraceptives or hormone replacement therapy;
- has malignancy (association is strongest with cancers other than non-melanoma skin cancers);
- is undergoing major surgery.

## **3. Concomitant and prohibited concomitant medications in OCTAVE Open**

### *3.1 Concomitant medications*

The following therapies for the treatment of ulcerative colitis were allowed providing their doses were not changed (reduced or increased), with the exception of oral 5-aminosalicylates or sulfasalazine, and oral corticosteroids (see below), during the study treatment period:

- Oral 5-aminosalicylates or sulfasalazine dose modifications during the study were permitted
- Chronic treatment for ulcerative colitis with antibiotics (e.g. metronidazole, rifaximin) if continued from the preceding study
- Oral corticosteroids were allowed for patients entering OCTAVE Open on oral corticosteroids (maximum dose of 25 mg/day of oral prednisone or equivalent) and tapering was required to commence starting the first week of the study
  - The daily dose of oral prednisone or equivalent was decreased at a rate of 5 mg/week until the dose reached 20 mg/day, then reduced by 2.5 to 5.0 mg/week until the dose reached 0 mg
  - If a patient experienced worsening of ulcerative colitis symptoms during the corticosteroid taper, or symptoms related to chronic corticosteroid therapy that in the opinion of the investigator are attributable to the corticosteroid taper, then the investigator could instruct the patient to revert back to the preceding dose in the taper schedule (i.e. “step up”). Study patients with signs or symptoms attributed to corticosteroid taper are permitted to “step up” their corticosteroid dosage one time during the study and then resume corticosteroid taper to achieve steroid-free status
  - If a patient was unable to tolerate tapering their corticosteroid dose below 10 mg/day, the patient was permitted to remain in the study provided their dose did not exceed 10 mg/day. However, efforts were made to taper corticosteroids completely
  - Re-initiation of oral corticosteroid therapy above 10 mg/day of prednisone or equivalent for the treatment of ulcerative colitis, after a patient had achieved

steroid-free status during either OCTAVE Sustain or OCTAVE Open, was considered rescue therapy and the patient was discontinued from the study

- Initiation of oral corticosteroids during OCTAVE Open for the treatment of non-ulcerative colitis indications (e.g. allergic reaction, asthma, etc.) may be permitted and the sponsor should be notified.

### *3.2. Prohibited concomitant medications*

The following medications were prohibited:

- Azathioprine, 6-mercaptopurine and methotrexate;
- Cyclosporine, mycophenolate mofetil/mycophenolic acid and tacrolimus;
- Interferon;
- Tumour necrosis factor inhibitor therapy (e.g. infliximab, adalimumab, golimumab or certolizumab);
- Intravenous corticosteroids;
- Rectally administered formulation of corticosteroids or 5-aminosalicylates;
- Natalizumab, vedolizumab or other anti-adhesion molecule therapy (including investigational agents);
- Other investigational or marketed immunosuppressants or biologics with immunomodulatory properties;
- Leukocyte apheresis, including selective lymphocyte, monocyte or granulocyte apheresis (e.g. Cellsorba<sup>®</sup>) or plasma exchange;
- Moderate to potent CYP3A inducers or inhibitors due to potential for drug interactions or confounding of data interpretation;

#### **4. Trial locations**

##### **United States, Alabama**

Alabama Medical Group, P.C.

Mobile, Alabama, United States, 36608

##### **United States, Arizona**

Desert Sun Clinical Research, LLC

Tucson, Arizona, United States, 85710

Desert Sun Gastroenterology

Tucson, Arizona, United States, 85710

Desert Sun Surgery Center

Tucson, Arizona, United States, 85710

##### **United States, California**

Altman Clinical and Translational Research Institute

La Jolla, California, United States, 92037-0897

Perlman Medical Offices - UC San Diego Health System

La Jolla, California, United States, 92037

UCSD Medical Center

La Jolla, California, United States, 92093

Cedars Sinai Medical Center

Los Angeles, California, United States, 90048

Cedars Sinai Surgery Center

Los Angeles, California, United States, 90048

Alliance Clinical Research

Oceanside, California, United States, 92056

Center for Endoscopy- Covenant Surgical Partners

Oceanside, California, United States, 92056

Sharp Rees-Stealy Medical Group, Inc.

San Diego, California, United States, 92101

Clinical Applications Laboratories, Inc

San Diego, California, United States, 92103

Sharp Rees-Stealy Medical Group

San Diego, California, United States, 92123

UCSF Center for Colitis and Crohn's Disease

San Francisco, California, United States, 94115

### **United States, Connecticut**

Connecticut Clinical Research Institute

Bristol, Connecticut, United States, 06010

Endoscopy Center of Connecticut, LLC

Guilford, Connecticut, United States, 06437

Endoscopy Center of Connecticut, LLC

Hamden, Connecticut, United States, 06518

Gastroenterology Center of Connecticut, PC

Hamden, Connecticut, United States, 06518

Medical Research Center of Connecticut, LLC

Hamden, Connecticut, United States, 06518

Yale New Haven Hospital

New Haven, Connecticut, United States, 06510

Yale University School of Medicine

New Haven, Connecticut, United States, 06510

### **United States, Florida**

Nature Coast Clinical Research

Inverness, Florida, United States, 34452

North Florida Gastroenterology Research, LLC

Orange Park, Florida, United States, 32073

Citrus Ambulatory Surgery Center

Orlando, Florida, United States, 32806

Internal Medicine Specialists

Orlando, Florida, United States, 32806

Advanced Gastroenterology Center

Port Orange, Florida, United States, 32127

Advanced Medical Research Center

Port Orange, Florida, United States, 32127

Endoscopy Center

Port Orange, Florida, United States, 32127

Port Orange Urgent Care

Port Orange, Florida, United States, 32127

Florida Medical Clinic, P.A.

Zephyrhills, Florida, United States, 33542

### **United States, Georgia**

Atlanta Center for Gastroenterology, P.C.

Decatur, Georgia, United States, 30033

Gastroenterology Associates of Central Georgia, LLC

Macon, Georgia, United States, 31201

Atlanta Gastroenterology Specialists, PC

Suwanee, Georgia, United States, 30024

### **United States, Kansas**

Cotton O'Neil Clinical Research Center, Digestive Health

Topeka, Kansas, United States, 66606

### **United States, Maryland**

Digestive Disease Associates, PA

Catonsville, Maryland, United States, 21228

Gastrointestinal Diagnostic Center

Catonsville, Maryland, United States, 21228

MGG Group Co., Inc., Chevy Chase Clinical Research

Chevy Chase, Maryland, United States, 20815

Howard County GIDC

Columbia, Maryland, United States, 21044

**United States, Michigan**

East Ann Arbor Health and Geriatrics Center -UMHS

Ann Arbor, Michigan, United States, 48109-2701

University of Michigan Health Systems

Ann Arbor, Michigan, United States, 48109

Michigan Clinical Research Unit - UMHS

Ann Arbor, Michigan, United States, 48109-5872

Medical Science Research Building 1 - UMHS

Ann Arbor, Michigan, United States, 48109

Clinical Research Institute of Michigan, LLC

Chesterfield, Michigan, United States, 48047

Center for Digestive Health

Troy, Michigan, United States, 48098

Surgical Centers of Michigan

Troy, Michigan, United States, 48098

Huron Gastroenterology Associates - Center for Digestive Care

Ypsilanti, Michigan, United States, 48197

**United States, Minnesota**

Mayo Clinic

Rochester, Minnesota, United States, 55905

**United States, New Hampshire**

Dartmouth Hitchcock Medical Center

Lebanon, New Hampshire, United States, 03756

**United States, New Jersey**

AGA Clinical Research Associates, LLC

Egg Harbor Township, New Jersey, United States, 08234



South Jersey Gastroenterology, P.A.

Marlton, New Jersey, United States, 08053

The Gastroenterology Group of South Jersey

Vineland, New Jersey, United States, 08360

**United States, New York**

NYU Langone Long Island Clinical Research Associates

Lake Success, New York, United States, 11042

IBD Center - The Mount Sinai Hospital

New York, New York, United States, 10029

Icahn School of Medicine at Mount Sinai

New York, New York, United States, 10029

Columbia University Irving Medical Center

New York, New York, United States, 10032

Kornbluth, Legnani, George MD, PC

New York, New York, United States, 10128

University of Rochester

Rochester, New York, United States, 14642

**United States, North Carolina**

Carolina Research, Carolina Digestive Diseases

Greenville, North Carolina, United States, 27834

**United States, Ohio**

Cleveland Clinic

Cleveland, Ohio, United States, 44195

Great Lakes Gastroenterology Research, LLC

Mentor, Ohio, United States, 44060

**United States, Tennessee**

Vanderbilt University Medical Center

Nashville, Tennessee, United States, 37212-1375

**United States, Texas**

Texas Clinical Research Institute

Arlington, Texas, United States, 76012

Baylor College of Medicine- Baylor Medical Center

Houston, Texas, United States, 77030

McGovern Medical School -The University of Texas Health Science Center at Houston

Houston, Texas, United States, 77030

Memorial Hermann Hospital

Houston, Texas, United States, 77030

Tyler Research Institute, LLC

Tyler, Texas, United States, 75701

**United States, Utah**

Alpine Medical Group

Salt Lake City, Utah, United States, 84102

Salt Lake Regional Hospital

Salt Lake City, Utah, United States, 84102

Wasatch Clinical Research

Salt Lake City, Utah, United States, 84107

**United States, Virginia**

VCU Health System Digestive Health Center

Richmond, Virginia, United States, 23298

VCU Health System Endoscopy Suite

Richmond, Virginia, United States, 23298

Virginia Commonwealth University

Richmond, Virginia, United States, 23298

**United States, Wisconsin**

Center for Digestive Health

Milwaukee, Wisconsin, United States, 53215

Wisconsin Center for Advanced Research - a division of GI Associates, LLC

Milwaukee, Wisconsin, United States, 53215

**Australia, Australian Capital Territory**

The Canberra Hospital

Garran, Australian Capital Territory, Australia, 2605

**Australia, New South Wales**

Royal Prince Alfred Hospital

Camperdown, New South Wales, Australia, 2050

Concord Repatriation General Hospital

Concord, New South Wales, Australia, 2139

Nepean Hospital

Kingswood, New South Wales, Australia, 2747

Liverpool Hospital eastern Campus

Liverpool, New South Wales, Australia, 2170

**Australia, Victoria**

Eastern Health, Box Hill Hospital

Box Hill, Victoria, Australia, 3128

Gastroenterology and Hepatology Unit

Clayton, Victoria, Australia, 3168

**Austria**

Landeskrankenhaus Innsbruck

Innsbruck, Austria, 6020

Krankenhaus Barmherzige Brueder St. Veit/Glan

St. Veit an der Glan, Austria, 9300

AKH Wien, Universitaetsklinik fuer Innere Medizin III

Wien, Austria, 1090

**Belgium**

GZA St Vincentius

Antwerpen, Belgium, 2018

AZ Groeninge

Kortrijk, Belgium, 8500

UZ Leuven (University Hospital Leuven), Campus Gasthuisberg

Leuven, Belgium, 3000

H-Hartziekenhuis Roeselare-Menen vzw

Roeselare, Belgium, 8800

### **Brazil**

Hospital de Clinicas de Porto Alegre - HCPA

Porto Alegre, RIO Grande DO SUL, Brazil, 90035-003

### **Canada, Alberta**

University of Calgary, Heritage Medical Research Clinic, TRW Building

Calgary, Alberta, Canada, T2N 4Z6

University of Alberta Hospital - Walter C. Mackenzie Health Sciences Centre

Edmonton, Alberta, Canada, T6G 2B7

University of Alberta - Zeidler Leducor Centre

Edmonton, Alberta, Canada, T6G 2X8

### **Canada, Ontario**

McMaster University Medical Center

Hamilton, Ontario, Canada, L8N 3Z5

London Health Sciences Centre - University Hospital

London, Ontario, Canada, N6A 5A5

### **Canada, Quebec**

Hopital Maisonneuve-Rosemont/Pavillon Rachel-Tourigny

Montreal, Quebec, Canada, H1T 2M4

Montreal General Hospital - McGill University Health Care Centre

Montreal, Quebec, Canada, H3G 1A4

### **Canada, Saskatchewan**

Saskatoon City Hospital

Saskatoon, Saskatchewan, Canada, S7K 0M7

Royal University Hospital

Saskatoon, Saskatchewan, Canada, S7N 0W8

### **Colombia**

Instituto de Coloproctologia ICO S.A.S.

Medellin, Antioquia, Colombia, 00000

### **Croatia**

University Hospital Center Zagreb

Zagreb, Croatia, 10 000

### **Czechia**

Hepato-Gastroenterologie HK, s.r.o.

Hradec Kralove, Czechia, 500 12

Klinicke Centrum ISCARE I.V.F., Gastroenterologie

Praha 7, Czechia, 170 04

Nemocnice Strakonice, a.s., Interni oddeleni

Strakonice, Czechia, 386 29

Krajska Zdravotni, A.S.,

Usti Nad Labem, Czechia, 401 13

### **Denmark**

Bispebjerg Hospital

Copenhagen, NV, Denmark, 2400

Aalborg Hospital

Aalborg, Denmark, 9000

Aarhus University Hospital

Aarhus C, Denmark, 8000

Hvidovre Hospital

Hvidovre, Denmark, 2650

Odense University Hospital

Odense C, Denmark, 5000

## **Estonia**

West Tallinn Central Hospital

Tallinn, Harjumaa, Estonia, 10617

Innomedica OU

Tallinn, Estonia, 10117

## **France**

CHU Amiens-Picardie - Hopital Sud

Amiens Cedex 01, France, 80054

Hôpital Beaujon, Gastroenterologie, MICI et Assistance Nutritive

Clichy, France, 92110

CHU de Nantes - Hotel Dieu-Service d'Hepato-Gastroenterologie

Nantes, France, 44093

Hôpital Saint Antoine - Service de Gastroenterologie

Paris cedex 12, France, 75571

Hôpital Saint Louis - Service d'hepato-gastroenterologie

Paris, France, 75010

Hôpital Saint Louis

Paris, France, 75010

Hopital Haut-Leveque-CMC Magellan- Unite de Recherche Clinique

Pessac, France, 33604

CHU de Reims - Hopital Robert Debre

Reims cedex, France, 51092

Hopital Nord

St Priest En Jarez, France, 42270

Hopital Rangueil

Toulouse Cedex 9, France, 31059

## **Germany**

Universitätsklinikum Schleswig-Holstein, Campus Kiel

Kiel, Schlewig Holstein, Germany, 24105

Universitaetsmedizin Berlin, Charite Campus Virchow-Klinikum, Medizinische Klinik mit

Berlin, Germany, 13353

Universitaeskllinikum Halle, Klinik und Poliklinik fuer Innere Medizin I

Halle, Germany, 06120

Medizinische Hochschule Hannover

Hannover, Germany, 30625

Klinikum Lüneburg

Lüneburg, Germany, 21339

Gastroenterologische Gemeinschaftspraxis Minden

Minden, Germany, 32423

University Hospital Munich-Grosshadern

Munich, Germany, 81377

Universitaetskllinikum Ulm

Ulm, Germany, 89081

## **Hungary**

Bekes Megyei Kozponti Korhaz Dr. Rethy Pal Tagkorhaza; III. Belgyogyaszat - Gasztroenterologia'.

Bekescsaba, Hungary, 5600

Peterfy Sandor utcai Korhaz-Rendelointezet es Manninger Jenő Országos Traumatologiai Intezet

Budapest, Hungary, 1076

Szent Janos Korhaz es Eszak-budai Egyesitett Korhazak I Belgyógyászati-Gasztroenterológiai Osztály

Budapest, Hungary, 1125

Pannonia Maganorvosi Centrum Kft.

Budapest, Hungary, 1136

Szent Margit Korhaz, III. Belgyógyászati-Gasztroenterológiai Osztály

Budapest, Hungary, H-1032

Debreceni Egyetem Klinikai Kozpont

Debrecen, Hungary, 4032

Bekes Megyei Központi Korház Pandy Kalman Tagkorháza III.sz. Belgyógyászat  
Gastroenterologia

Gyula, Hungary, 5700

Borsod-Abaúj-Zemplén Megyei Korház és Egyetemi Oktató Korház

Miskolc, Hungary, 3526

Karolina Korház

Mosonmagyaróvár, Hungary, 9200

Pécsi Tudományegyetem Klinikai Központ

Pécs, Hungary, 7624

Szegedi Tudományegyetem Szent-Györgyi Albert Klinikai Központ, I. Sz.  
Belgyógyászati Klinika

Szeged, Hungary, 6720

Javorszky Odon Korház

Vac, Hungary, 2600

## **Israel**

Rambam Health Care Campus

Haifa, Israel, 31096

The Edith Wolfson Medical Center/Gastroenterology Department

Holon, Israel, 58100

Rabin Medical Center, Beilinson campus

Petah Tikva, Israel, 49100

## **Italy**

Istituto Clinico Humanitas IRCCS-IBD Center

Rozzano, Milano, Italy, 20089

AOR Villa Sofia-Cervello

Palermo, PA, Italy, 90146

AOU Mater Domini - U.O. Fisiopatologia Digestiva

Catanzaro, Italy, 88100



## **Japan**

Aichi Medical University Hospital

Nagakute, Aichi, Japan, 480-1195

National Hospital Organization Hirosaki National Hospital

Hirosaki, Aomori, Japan, 036-8545

Toho University Sakura Medical Center

Sakura, Chiba, Japan, 285-8741

Kurume University Hospital

Kurume, Fukuoka, Japan, 830-0011

Hokkaido P.W.F.A.C Sapporo-Kosei general Hospital

Sapporo, Hokkaido, Japan, 060-0033

National Hospital Organization Mito Medical Center

Higashi-ibaraki-gun, Ibaraki, Japan, 311-3193

Sameshima Hospital

Kagoshima-shi, Kagoshima, Japan, 892-0846

Kuniyoshi Hospital

Kochi-shi, Kochi, Japan, 780-0901

National Hospital Organization Sendai Medical Center

Sendai, Miyagi, Japan, 983-8520

Osaka City University Hospital

Osaka City, Osaka, Japan, 545-8586

Osaka Medical College Hospital

Takatsuki-shi, Osaka, Japan, 569-8686

Shiga University of Medical Science Hospital

Otsu, Shiga, Japan, 520-2192

Tokyo Medical and Dental University Hospital, Faculty of Medicine

Bunkyo-ku, Tokyo, Japan, 113-8519

Tokai University Hachioji Hospital

Hachioji, Tokyo, Japan, 192-0032

Jikei University Hospital

Minato-ku, Tokyo, Japan, 105-8471

Kitasato University Kitasato Institute Hospital

Minato-ku, Tokyo, Japan, 108-8642

Keio University Hospital

Shinjuku-ku, Tokyo, Japan, 160-8582

Fukuoka University Chikushi Hospital

Fukuoka, Japan, 818-8502

Hiroshima University Hospital

Hiroshima, Japan, 734-8551

The Hospital of Hyogo College of Medicine

Hyogo, Japan, 663-8501

Showa University Hospital

Tokyo, Japan, 142-8666

### **Korea, Republic of**

Hanyang University Guri Hospital

Guri-si, Gyeonggi-do, Korea, Republic of, 11923

Gachon University Gil Medical Center

Incheon, Korea, Republic of, 21565

Kyung Hee University Hospital

Seoul, Korea, Republic of, 02447

Seoul National University Hospital,

Seoul, Korea, Republic of, 03080

Severance Hospital, Yonsei University Health System

Seoul, Korea, Republic of, 03722

Asan Medical Center

Seoul, Korea, Republic of, 05505

Samsung Medical Center

Seoul, Korea, Republic of, 06351

**Latvia**

Digestive Diseases Center GASTRO

Riga, Latvia, LV-1006

**Netherlands**

VU University Medical Center

Amsterdam, Netherlands, 1081 HV

Academic Medical Center (AMC)

Amsterdam, Netherlands, 1105 AZ

University Medical Center Groningen (UMCG)

Groningen, Netherlands, 9713 GZ

Leiden University Medical Center

Leiden, Netherlands, 2333 ZA

**New Zealand**

Clinical Trials Unit- Tauranga Hospital-Bay of Plenty (BOP) Clinical School

Tauranga, Bay of Plenty, New Zealand, 3112

Christchurch Hospital

Christchurch, Canterbury, New Zealand, 8011

North Shore Hospital (Waitemata District Health Board)

Auckland, New Zealand, 0620

Auckland City Hospital

Auckland, New Zealand, 1023

Southern District Health Board

Dunedin, New Zealand, 9016

Waikato Hospital

Hamilton, New Zealand, 3240

P3 Research Limited

Wellington, New Zealand, 6021

## **Poland**

Centrum Medyczne Szpital Sw. Rodziny Sp. z o. o.

Lodz, Iodzkie, Poland, 90-302

Centrum Endoskopii Zabiegowej, Poradnia Chorob Jelitowych

Bydgoszcz, Kujawsko-pomorskie, Poland, 85-168

Gabinet Lekarski - Janusz Rudzinski

Bydgoszcz, Kujawsko-pomorskie, Poland, 85-681

Klinika Chorob Wewnętrznych i Gastroenterologii z Pododdziałem Leczenia  
Nieswoistych Chorob

Warszawa, Mazowieckie, Poland, 02-507

Oddzial Chorob Wewnętrznych i Gastroenterologii, SP ZOZ Wojewodzki Szpital

Bialystok, Podlaskie, Poland, 15-950

H-T. Centrum Medyczne - ENDOTERAPIA

Tychy, Slaskie, Poland, 43-100

Gabinet Endoskopii Przewodu Pokarmowego

Krakow, Poland, 31-009

Oddzial Kliniczny Gastroenterologii Ogolnej i Onkologicznej, Uniwersytecki Szpital  
Kliniczny nr

Lodz, Poland, 90-153

Endoskopia SP. Z O.O.

Sopot, Poland, 81-756

Nzoz Vivamed

Warszawa, Poland, 03-580

Lexmedica

Wroclaw, Poland, 53-114

## **Romania**

Cabinet Particular Policlinic Algomed SRL

Timisoara, Timis, Romania, 300002

Spitalul Universitar de Urgenta Bucharest, Medicina Interna II Gastroenterologie

Bucuresti, Romania, 050098

## **Russian Federation**

Federal State Budgetary Institution "State Scientific Centre of Coloproctology n.a. A.N. Ryzhikh"

Moscow, Russian Federation, 123423

State budget Healthcare Institution Moscow regional scientific research clinical institute

Moscow, Russian Federation, 129110

State budget Institution of Healthcare Nizhniy Novgorod Regional Clinical Hospital named after N. A.

Nizhniy Novgorod, Russian Federation, 603126

Municipal Budget Institution of Healthcare of Novosibirsk

Novosibirsk, Russian Federation, 630084

Federal State Budgetary Institution Scientific Research Institute of Physiology and Fundamental

Novosibirsk, Russian Federation, 630117

FSBI "Scientific Research Institute of Physiology and Fundamental Medicine"

Novosibirsk, Russian Federation, 630117

Non-State Healthcare Institution "Road Clinical Hospital at the station Samara"

Samara, Russian Federation, 443029

Limited Liability Company Medical Company "Hepatolog"

Samara, Russian Federation, 443093

Samara Diagnostic center, X-ray Department

Samara, Russian Federation, 443093

State budget institution of healthcare of Yaroslavl region Regional clinical hospital

Yaroslavl, Russian Federation, 150062

## **Serbia**

Military Medical Academy

Belgrade, Central Serbia, Serbia, 11000

Clinical Centre of Serbia Clinic for Gastroenterology and Hepatology

Belgrade, Serbia, 11000

Clinical Hospital Center Zvezdara - Clinic for Gastroenterology and Hepatology

Belgrade, Serbia, 11000

Clinical Centre of Kragujevac Clinic for Gastroenterology and Hepatology

Kragujevac, Serbia, 34000

Clinical Centre of Vojvodina Emergency Internal Medicine Division

Novi Sad, Serbia, 21000

Clinical Centre of Vojvodina, Clinic for Gastroenterology and Hepatology

Novi Sad, Serbia, 21000

General Hospital Djordje Joanovic

Zrenjanin, Serbia, 23000

### **Slovakia**

Medak s.r.o.

Bratislava, Slovakia, 85101

"KM Management spol. s.r.o. Gastroenterologicke a hepatologicke centrum Nitra

Nitra, Slovakia, 949 01

Poliklinika Libris, Synergy group, a.s.,

Nove Mesto nad Vahom, Slovakia, 915 01

Gastro I., s.r.o.

Presov, Slovakia, 080 01

### **South Africa**

Chris Hani Baragwanath Academic Hospital

Johannesburg, Gauteng, South Africa, 2013

Panorama Medi-Clinic

Cape Town, Western Cape, South Africa, 7500

Louis Leipoldt Medical Centre

Cape Town, Western Cape, South Africa, 7530

Dr JP Wright

Cape Town, Western Cape, South Africa, 7708

Endocare Research Centre

Paarl, Western Cape, South Africa, 7646

## **Spain**

Hospital Universitario de Bellvitge

L'Hospitalet de Llobregat, Barcelona, Spain, 08907

Hospital Universitario de Fuenlabrada

Fuenlabrada, Madrid, Spain, 28942

Hospital Clinic i Provincial de Barcelona

Barcelona, Spain, 08036

Corporacio Sanitaria Parc Tauli

Barcelona, Spain, 08208

Hospital Universitario de La Princesa

Madrid, Spain, 28006

Hospital Clinico San Carlos

Madrid, Spain, 28040

## **Taiwan**

National Taiwan University Hospital

Taipei City, Taiwan, 10002

## **Ukraine**

Regional Municipal Institution "Chernivtsi Regional Clinical Hospital"

Chernivtsi, Ukraine, 58001

Regional Municipal Institution 'Chernivtsi Regional Clinical Hospital'

Chernivtsi, Ukraine, 58001

SI 'Institute of Gastroenterology of the NAMS of Ukraine', Dep.-nt of Stomach and Duodenum diseases

Dnipropetrovsk, Ukraine, 49074

Municipal Healthcare Institution Kharkiv City Clinical Hospital #2

Kharkiv, Ukraine, 61037

State Institution "L.T. Malaya Therapy Institute of NAMS of Ukraine"

Kharkiv, Ukraine, 61039

Kyiv Municipal Clinical Hospital #18, Proctology Department

Kyiv, Ukraine, 01030

LTD "St. Paraskeva Medical Center"

Lviv, Ukraine, 79019

Municipal City Clinical Hospital of the Emergency Medical Care, 1-st Therapy Department of hospital,

Lviv, Ukraine, 79059

Municipal Institution "Odesa Regional Clinical Hospital", polyclinic department

Odesa, Ukraine, 65025

"Odesa Clinical Hospital for Railway ""Branch of ""Healthcare center of Private JSC""Ukrainian

Odesa, Ukraine, 65059

CI of Uzhgorod Regional Rada Uzhgorod Central Regional Hospital.

Therapy Department. SHEI Uzhgorod

Uzhgorod, Ukraine, 88009

Vinnytsia Regional Clinical Hospital for War Veterans, Therapeutics Dept. No. 2

Vinnytsia, Ukraine, 21005

Minicipal Institution City Hospital #7, Therapeutic Department,

Zaporizhzhia, Ukraine, 69118

## **United Kingdom**

Bristol Royal Infirmary

Bristol, England, BS2 8HW, United Kingdom

Addenbrooke's Hospital - Cambridge University Hospitals NHS Foundation Trust

Cambridge, England, , United Kingdom, CB2 0QQ

The North West London Hospitals NHS Trust

Harrow, Middlesex, United Kingdom, HA1 3UJ

Norfolk and Norwich University Hospitals NHS Foundation Trust

Norwich, Norfolk, United Kingdom, NR4 7UY



UCLH NIHR Clinical Research Facility

London, United Kingdom, WLT 7HA

## Supplementary Tables

**TABLE S1** Additional reasons for discontinuation in OCTAVE Open

|                                           | <b>Tofacitinib<br/>5 mg b.d.<br/>(N = 175)</b> | <b>Tofacitinib<br/>10 mg b.d.<br/>(N = 769)<sup>†</sup></b> | <b>Tofacitinib<br/>All<br/>(N = 944)</b> |
|-------------------------------------------|------------------------------------------------|-------------------------------------------------------------|------------------------------------------|
| <b>Discontinuations, n (%)</b>            | 84 (48.0)                                      | 665 (86.5)                                                  | 749 (79.3)                               |
| No longer willing to participate in study | 24 (13.7)                                      | 79 (10.3)                                                   | 103 (10.9)                               |
| Withdrawn due to pregnancy                | 2 (1.1)                                        | 10 (1.3)                                                    | 12 (1.3)                                 |
| Due to protocol violation                 | 2 (1.1)                                        | 7 (0.9)                                                     | 9 (1.0)                                  |
| Lost to follow-up                         | 2 (1.1)                                        | 5 (0.7)                                                     | 7 (0.7)                                  |
| Due to not meeting entrance criteria      | 0 (0.0)                                        | 1 (0.1)                                                     | 1 (0.1)                                  |
| Due to another reason <sup>‡</sup>        | 3 (1.7)                                        | 13 (1.7)                                                    | 16 (1.7)                                 |

<sup>†</sup>All patients underwent endoscopy at Month 2; induction non-responders were mandated to discontinue if they failed to achieve clinical response by Month 2.

<sup>‡</sup>Includes all the other reasons for withdrawal from OCTAVE Open.

b.d., twice daily; N, number of patients in the treatment group; n, number of unique patients with a particular adverse event.

**TABLE S2** Summary of deaths in OCTAVE Open

| <b>Cause of death<br/>Preferred term (verbatim term)</b>                                                                 | <b>Tofacitinib dose</b> | <b>Therapy stop date</b> | <b>Date of death</b> |
|--------------------------------------------------------------------------------------------------------------------------|-------------------------|--------------------------|----------------------|
| Hepatic angiosarcoma (liver infiltration of angiosarcoma epithelioid) <sup>†</sup>                                       | 10 mg b.d.              | June 26, 2015            | August 9, 2015       |
| Adenocarcinoma metastatic (metastatic adenocarcinoma) <sup>‡</sup>                                                       | 10 mg b.d.              | March 28, 2019           | December 24, 2019    |
| Acute myeloid leukaemia (acute myeloid leukaemia) <sup>‡</sup>                                                           | 10 mg b.d.              | December 17, 2015        | February 6, 2016     |
| Pulmonary embolism (pulmonary embolism) <sup>‡,§</sup>                                                                   | 10 mg b.d.              | July 20, 2014            | July 26, 2014        |
| Cardiac arrest (cardiac arrest) <sup>‡,¶</sup>                                                                           | 10 mg b.d.              | June 10, 2019            | February 1, 2020     |
| Multiple organ dysfunction syndrome (multiple organ failure as a result of the cancer [malignant melanoma]) <sup>‡</sup> | 10 mg b.d.              | September 29, 2016       | March 7, 2017        |

<sup>†</sup>The investigator assessed this serious adverse event as related to study drug.

<sup>‡</sup>The investigator assessed this serious adverse event as unrelated to study drug.

<sup>§</sup>This event occurred in a patient who had also experienced a cholangiocarcinoma and a serious adverse event of metastases to the peritoneum.

<sup>¶</sup>Death occurred in the setting of lung cancer and pneumothorax post lung biopsy.

b.d., twice daily.

**TABLE S3** Listing of adjudicated malignancy (excluding NMSC) events in OCTAVE Open

| <b>Preferred term<br/>(malignancy classification)†</b>                      | <b>Tofacitinib<br/>dose</b> | <b>Age‡</b> | <b>Event<br/>onset<br/>day§</b> | <b>Prior<br/>immunosuppressant<br/>use</b> | <b>Prior<br/>TNFi<br/>use</b> |
|-----------------------------------------------------------------------------|-----------------------------|-------------|---------------------------------|--------------------------------------------|-------------------------------|
| Pulmonary mass (lung cancer)                                                | 5 mg b.d.                   | 75          | 269                             | yes                                        | no                            |
| Cervical dysplasia (cervical cancer)                                        | 5 mg b.d.                   | 33          | 390                             | no                                         | yes                           |
| Diffuse large B-cell lymphoma<br>(non-Hodgkin lymphoma)                     | 5 mg b.d.                   | 54          | 624                             | no                                         | yes                           |
| Breast cancer (breast cancer)                                               | 5 mg b.d.                   | 54          | 640                             | yes                                        | no                            |
| Breast cancer (breast cancer)                                               | 5 mg b.d.                   | 83          | 1037                            | yes                                        | no                            |
| Cholangiocarcinoma (liver cancer)                                           | 5 mg b.d.                   | 40          | 1978                            | no                                         | no                            |
| Penile dysplasia (cancer of the penis)                                      | 5 mg b.d.                   | 73          | 766                             | yes                                        | no                            |
| Cervical dysplasia (cervical cancer)                                        | 10 mg b.d.                  | 38          | 489                             | yes                                        | no                            |
| Malignant melanoma<br>(melanoma of the skin)                                | 10 mg b.d.                  | 43          | 1569                            | yes                                        | no                            |
| Malignant melanoma<br>(melanoma of the skin)                                | 10 mg b.d.                  | 66          | 1345                            | no                                         | no                            |
| Oesophageal adenocarcinoma (oesophagus/esophagogastric<br>junction cancers) | 10 mg b.d.                  | 60          | 988                             | yes                                        | no                            |
| Hepatic angiosarcoma<br>(soft tissue sarcoma)                               | 10 mg b.d.                  | 54          | 164                             | yes                                        | yes                           |
| Invasive ductal breast carcinoma<br>(breast cancer)                         | 10 mg b.d.                  | 45          | 642                             | yes                                        | no                            |
| Bowen's disease (cancer of the penis)                                       | 10 mg b.d.                  | 68          | 776                             | yes                                        | yes                           |
| Essential thrombocythemia (myeloproliferative neoplasms)                    | 10 mg b.d.                  | 30          | 279                             | no                                         | no                            |

|                                                                                         |            |    |      |     |     |
|-----------------------------------------------------------------------------------------|------------|----|------|-----|-----|
| Acute myeloid leukaemia<br>(acute myeloid leukaemia and<br>related precursor neoplasms) | 10 mg b.d. | 53 | 310  | yes | yes |
| Cholangiocarcinoma (gallbladder and extrahepatic bile duct<br>cancer)                   | 10 mg b.d. | 70 | 381  | yes | yes |
| Cutaneous leiomyosarcoma<br>(soft tissue sarcoma)                                       | 10 mg b.d. | 82 | 556  | yes | yes |
| Epstein-Barr virus-associated lymphoma (non-Hodgkin<br>lymphoma)                        | 10 mg b.d. | 52 | 45   | yes | yes |
| Renal cell carcinoma (renal cancer)                                                     | 10 mg b.d. | 46 | 257  | yes | yes |
| Adenocarcinoma of colon<br>(colorectal cancer)                                          | 10 mg b.d. | 35 | 745  | yes | yes |
| Adenocarcinoma of colon<br>(colorectal cancer)                                          | 10 mg b.d. | 47 | 57   | yes | yes |
| Adenocarcinoma metastatic<br>(colorectal cancer)                                        | 10 mg b.d. | 47 | 2035 | yes | yes |
| Colorectal cancer metastatic<br>(colorectal cancer)                                     | 10 mg b.d. | 28 | 1550 | yes | yes |
| Lung neoplasm malignant (lung cancer)                                                   | 10 mg b.d. | 73 | 1652 | no  | yes |

†Malignancy classification was based on adjudication committee.

‡Age at the time of event onset.

§Day of study in relation to first day of study drug dosing.

b.d., twice daily; NMSC, non-melanoma skin cancer; TNFi, tumour necrosis factor inhibitor.

**TABLE S4** Listing of adjudicated NMSC events in OCTAVE Open

| Tofacitinib dose               | Demographics       |        |                  | NMSC history | Prior immunosuppressant use | Prior TNFi use |
|--------------------------------|--------------------|--------|------------------|--------------|-----------------------------|----------------|
|                                | Race               | Sex    | Age <sup>†</sup> |              |                             |                |
| <b>Basal cell carcinoma</b>    |                    |        |                  |              |                             |                |
| 5 mg b.d.                      | White              | Female | 48               | no           | yes                         | yes            |
| 5 mg b.d.                      | White              | Male   | 65               | no           | yes                         | no             |
| 5 mg b.d.                      | White              | Female | 58               | no           | no                          | no             |
| 5 mg b.d.                      | White <sup>‡</sup> | Male   | 71               | yes          | yes                         | no             |
| 5 mg b.d.                      | White              | Female | 46               | yes          | yes                         | yes            |
| 10 mg b.d.                     | §                  | Female | 65               | no           | yes                         | yes            |
| 10 mg b.d.                     | White              | Male   | 72               | no           | yes                         | yes            |
| 10 mg b.d.                     | White              | Male   | 74               | no           | yes                         | no             |
| 10 mg b.d.                     | White              | Male   | 68               | no           | yes                         | yes            |
| 10 mg b.d.                     | White              | Male   | 68               | yes          | yes                         | yes            |
| 10 mg b.d.                     | White <sup>‡</sup> | Male   | 68               | no           | yes                         | yes            |
| 10 mg b.d.                     | White <sup>‡</sup> | Male   | 78               | yes          | yes                         | yes            |
| 10 mg b.d.                     | White              | Male   | 61               | no           | yes                         | yes            |
| <b>Squamous cell carcinoma</b> |                    |        |                  |              |                             |                |
| 5 mg b.d.                      | White              | Male   | 64               | yes          | yes                         | yes            |
| 5 mg b.d.                      | White <sup>‡</sup> | Male   | 71               | yes          | yes                         | no             |
| 5 mg b.d.                      | White <sup>‡</sup> | Female | 46               | yes          | yes                         | yes            |

|            |                    |        |    |     |     |     |
|------------|--------------------|--------|----|-----|-----|-----|
| 10 mg b.d. | White              | Male   | 50 | no  | yes | no  |
| 10 mg b.d. | White              | Male   | 69 | no  | yes | yes |
| 10 mg b.d. | White <sup>‡</sup> | Male   | 66 | no  | yes | yes |
| 10 mg b.d. | White <sup>‡</sup> | Male   | 78 | yes | yes | yes |
| 10 mg b.d. | White              | Female | 48 | no  | yes | yes |
| 10 mg b.d. | White              | Male   | 66 | yes | yes | yes |

---

<sup>†</sup>Age at the time of event onset.

<sup>‡</sup>Patient experienced both basal cell carcinoma and squamous cell carcinoma.

<sup>§</sup>Other (Middle Eastern).

b.d., twice daily; NMSC, non-melanoma skin cancer; TNFi, tumour necrosis factor inhibitor.

**TABLE S5** Listing of adjudicated MACE in OCTAVE Open

|                                                  | <b>Adjudicated event type (preferred term)</b>         |                                                      |                                                        |                                   |
|--------------------------------------------------|--------------------------------------------------------|------------------------------------------------------|--------------------------------------------------------|-----------------------------------|
|                                                  | Myocardial infarction<br>(acute myocardial infarction) | Cerebrovascular accident<br>(cerebellar haemorrhage) | Cerebrovascular accident<br>(cerebrovascular accident) | Cardiac death<br>(cardiac arrest) |
| Sex                                              | Male                                                   | Male                                                 | Male                                                   | Male                              |
| Age (years)                                      | 64                                                     | 55                                                   | 56                                                     | 67                                |
| Day of onset                                     | 1107                                                   | 1004                                                 | 786                                                    | 1661                              |
| Tofacitinib dose at onset                        | 5 mg b.d.                                              | 5 mg b.d.                                            | 10 mg b.d.                                             | 10 mg b.d.                        |
| Baseline CV risk factors                         |                                                        |                                                      |                                                        |                                   |
| Smoking status                                   | Non-smoker                                             | Non-smoker                                           | Smoker                                                 | Ex-smoker                         |
| BMI (kg/m <sup>2</sup> )                         | 22.7                                                   | 23.0                                                 | 30.1                                                   | 31.4                              |
| Medical history                                  | No significant medical history                         | Left ventricular hypertrophy; hypertension           | Diabetes mellitus; hypertension                        | Pulmonary embolism; dyslipidaemia |
| Concomitant medications                          |                                                        |                                                      |                                                        |                                   |
| Lipid-lowering                                   | Yes                                                    | Yes                                                  | Yes                                                    | Yes                               |
| Anti-diabetic                                    | No                                                     | No                                                   | Yes                                                    | No                                |
| Anti-hypertension                                | No                                                     | Yes                                                  | Yes                                                    | No                                |
| Baseline serum lipid concentrations <sup>†</sup> |                                                        |                                                      |                                                        |                                   |
| Total cholesterol, mg/dL                         | 220                                                    | 258                                                  | 242                                                    | 130                               |
| HDL-c, mg/dL                                     | 79                                                     | 47                                                   | 39                                                     | 43                                |
| LDL-c, mg/dL                                     | 118                                                    | 162                                                  | 128                                                    | 70                                |
| Triglycerides, mg/dL                             | 116                                                    | 246                                                  | 373                                                    | 84                                |



|                    |                           |                           |                           |       |
|--------------------|---------------------------|---------------------------|---------------------------|-------|
| Baseline CRP, mg/L | 0.74                      | 0.38                      | 29.03                     | 6.05  |
| Outcome            | Temporary discontinuation | Permanent discontinuation | Permanent discontinuation | Death |

MACE were adjudicated by an independent review committee and defined as any myocardial infarction, stroke or CV death.

†Reference ranges: total cholesterol, 130-200 mg/dL; HDL-c, 40-80 mg/dL; LDL-c, 0-130 mg/dL; triglycerides, 45-250 mg/dL; CRP, 0-3 mg/L.

b.d., twice daily; CRP, C-reactive protein; CV, cardiovascular; HDL-c, high-density lipoprotein cholesterol; LDL-c, low-density lipoprotein cholesterol; MACE, major adverse cardiovascular events.

**TABLE S6** Proportion of patients evaluated for drug-induced liver injury

| <b>n (%)</b>                           | <b>Tofacitinib<br/>5 mg b.d.<br/>(N = 175)</b> | <b>Tofacitinib<br/>10 mg b.d.<br/>(N = 769)</b> | <b>Tofacitinib<br/>All<br/>(N = 944)</b> |
|----------------------------------------|------------------------------------------------|-------------------------------------------------|------------------------------------------|
| Drug-induced liver injury <sup>†</sup> | 7 (4.0)                                        | 19 (2.5)                                        | 26 (2.8)                                 |
| Possible                               | 1 (0.6)                                        | 4 (0.5)                                         | 5 (0.5)                                  |
| Unlikely                               | 1 (0.6)                                        | 7 (0.9)                                         | 8 (0.8)                                  |
| Unrelated                              | 5 (2.9)                                        | 9 (1.2)                                         | 14 (1.5)                                 |
| Severity of injury                     |                                                |                                                 |                                          |
| Mild                                   | 3 (1.7)                                        | 14 (1.8)                                        | 17 (1.8)                                 |
| Moderate                               | 3 (1.7)                                        | 2 (0.3)                                         | 5 (0.5)                                  |
| Severe                                 | 0 (0.0)                                        | 2 (0.3)                                         | 2 (0.2)                                  |
| Fatal or transplantation               | 0 (0.0)                                        | 1 (0.1)                                         | 1 (0.1)                                  |
| Undetermined                           | 1 (0.6)                                        | 0 (0.0)                                         | 1 (0.1)                                  |
| Liver failure                          |                                                |                                                 |                                          |
| Yes                                    | 0 (0.0)                                        | 1 (0.1)                                         | 1 (0.1)                                  |
| No                                     | 7 (4.0)                                        | 18 (2.3)                                        | 25 (2.6)                                 |

<sup>†</sup>There were no undetermined, probable, highly likely or definite drug-induced liver injury events.

b.d., twice daily.

## Supplementary Figures

**Figure S1.** Overall patient disposition.

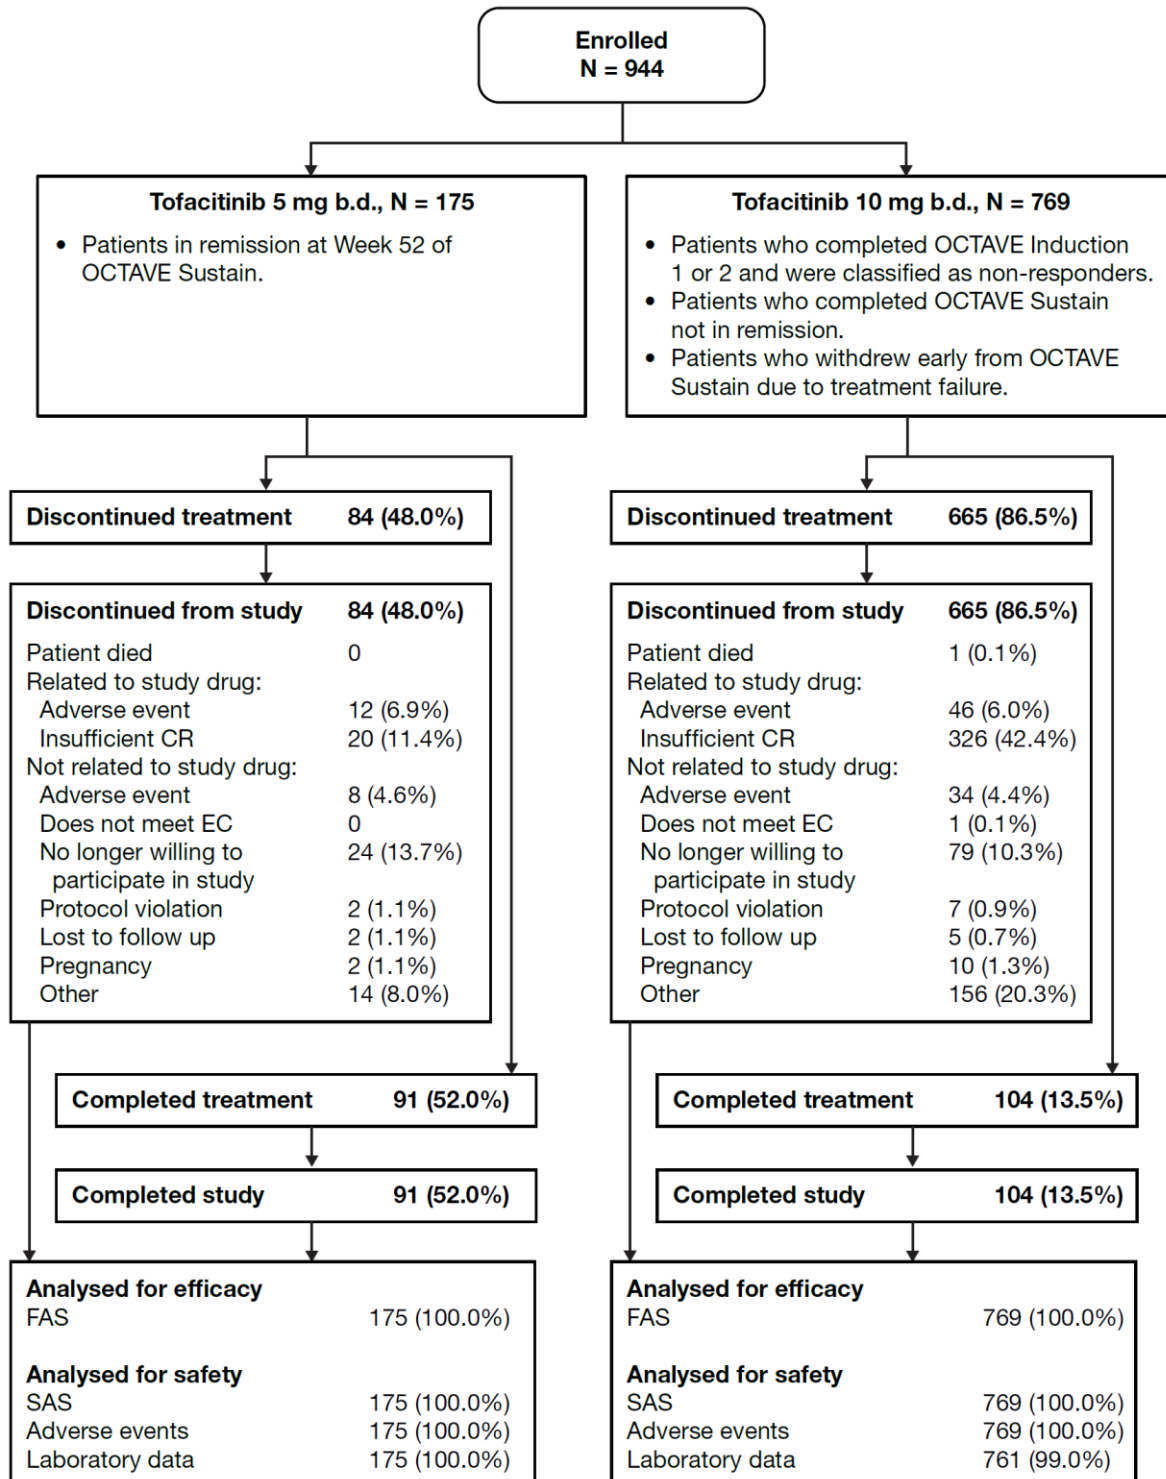

b.d., twice daily; CR, clinical response; EC, enrolment criteria; FAS, full analysis set; N, number of patients in the analysis population; SAS, safety analysis set.

**Figure S2.** Patient discontinuation over time (SAS).

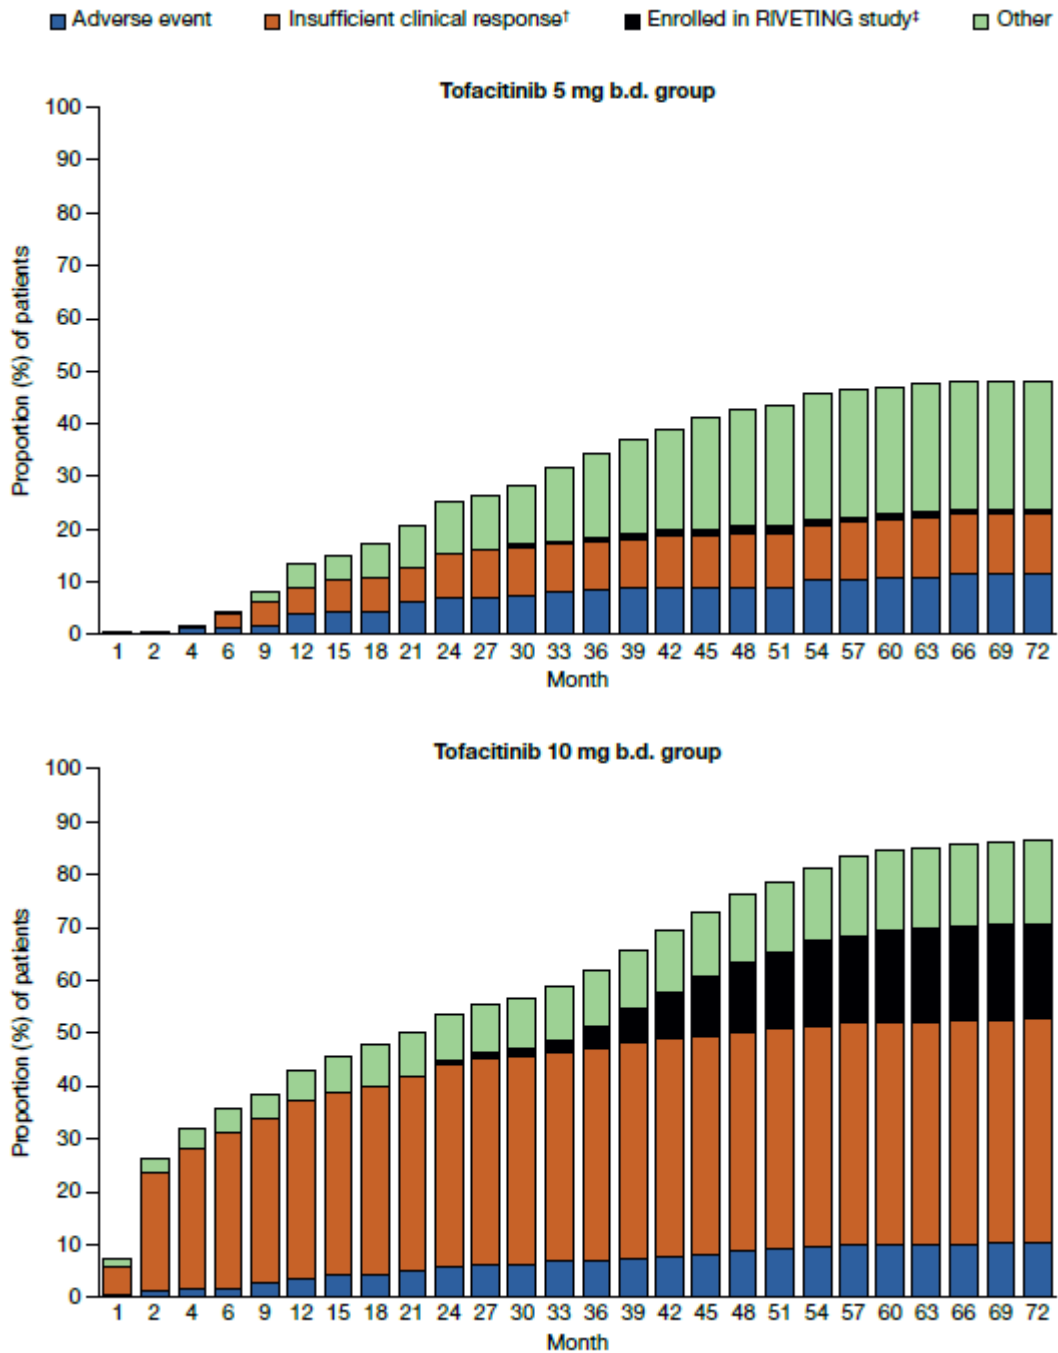

All patients underwent endoscopy at Month 2; induction non-responders (all assigned to tofacitinib 10 mg b.d.) were mandated to discontinue if they failed to achieve a clinical response by Month 2.

†Adverse events of worsening ulcerative colitis leading to discontinuation were designated as insufficient clinical response.

‡ClinicalTrials.gov number: NCT03281304.

b.d., twice daily; SAS, safety analysis set.
